# Supplementary material
Source: PubMed Central journal article supplement (PMC5997177)
Supplement: NIHMS77956-supplement-Supplementary_tables.pdf [file NIHMS77956-supplement-Supplementary_tables.pdf]

**Supplementary Table 1: Number of YFP positive cells per embryonic region in *Csf1r<sup>iCre</sup>* and *Csf1r<sup>MeriCreMer</sup>* embryos from E8.25 to E12.5.**

| embryonic day<br>somite pairs | E8.25 |        | E8.5 |        | E8.25-E8.5 |       | E10.25 |        | E10.5 |        | E11.5 |       | E12.5 |       |       |       |       |       |        |         |        |        |         |         |         |         |
|-------------------------------|-------|--------|------|--------|------------|-------|--------|--------|-------|--------|-------|-------|-------|-------|-------|-------|-------|-------|--------|---------|--------|--------|---------|---------|---------|---------|
|                               | YS    | Embryo | YS   | Caudal | Head       | YS    | Caudal | Head   | YS    | ACM    | Brain | Limbs | Liver | YS    | Brain | Skin  | Liver |       |        |         |        |        |         |         |         |         |
| n (embryos)                   | 7     | 7      | 4    | 4      | 16         | 8     | 8      | 8      | 5     | 8      | 8     | 8     | 8     | 8     | 8     | 8     | 8     | 5     |        |         |        |        |         |         |         |         |
|                               | Mean  | 1.4    | 64.8 | 0      | 0          | 8.4   | 287.3  | 17.8   | 27.5  | 2.1    | 63.6  | 13.4  | 41.2  | 3     | 4403  | 121.0 | 25.8  | 5.6   | 2.3    | 54892.0 | 4.5    | 2.4    | 1.8     | 61230.4 |         |         |
| SD                            | 1.3   | 0      | 27.8 | 0      | 0.6        | 59.5  | 6.0    | 5.5    | 114.0 | 14.4   | 12.0  | 2.0   | 2.4   | 2234  | 109.5 | 31.0  | 3.5   | 1.8   | 8606.0 | 3.8     | 3.2    | 1.6    | 17394.3 |         |         |         |
| Mean                          | n/a   | n/a    | 4    | 4      | 16         | 9     | 9      | 9      | 501.9 | 43.6   | 70.1  | 8.6   | 174.4 | 5     | 5     | 5     | 5     | 5     | 5      | 5       | 71.4   | 33.1   | 5       | 5       | 210.6   | 28159.2 |
|                               | SD    | 35     | 0    | 1.5    | 172.7      | 5.6   | 15.9   | 137.7  | 23.1  | 22.7   | 5.5   | 51.5  | 32.1  | 40.7  | 8.0   | 587.2 | 136.9 | 31.9  | 19.7   | 90.0    | 2317.0 | 36.4   | 7.7     | 74.9    | 86863.4 |         |
| Mean                          | 7     | 7      | 4    | 4      | 12         | 10    | 8      | 8      | 9     | 9      | 9     | 9     | 9     | 5     | 5     | 5     | 5     | 5     | 5      | 5       | 5      | 5      | 5       | 5       | 5       | 5       |
|                               | SD    | 1.4    | 0    | 0.0    | 0.0        | 161   | 2      | 10     | 143   | 3      | n/a   | n/a   | 39    | 26.8  | 33    | 4.8   | 198.2 | 32.7  | 4.4    | n/a     | 3077   | 20.5   | n/a     | n/a     | 1076    | 14.3    |
| Mean                          | 1.1   | 0      | 5    | 5      | 13         | 9     | 14     | 8      | 8     | 8      | 8     | 8     | 8     | 5     | 5     | 5     | 5     | 5     | 5      | 5       | 5      | 5      | 5       | 5       | 5       | 5       |
|                               | SD    | 16.1   | 0.4  | 10.6   | 323.8      | 34.0  | 241.4  | 1053.0 | 716.8 | 1894.0 | 91.3  | 574.2 | 153.2 | 4958  | 423.4 | 2028  | 4725  | 1524  | 2367   | 1669    | 7071   | 822.8  | 4169.4  | 2107.6  | 20177.4 |         |
| Mean                          | 13    | 0      | 13   | 0      | 138.0      | 22    | 138.0  | 8      | 8     | 8      | 8     | 8     | 8     | 5     | 5     | 5     | 5     | 5     | 5      | 5       | 5      | 5      | 5       | 5       | 5       | 5       |
|                               | SD    | 104.6  | 17.0 | 102.0  | 389.1      | 27.2  | 1477.0 | 57     | 57    | 57     | 57    | 57    | 1620  | 455   | 370   | 785.5 | 3941  | 1286  | 2140   | 1168    | 4046   | 2038.7 | 3783.5  | 1766.5  | 5952.2  |         |
| Mean                          | 3     | 3      | 3    | 3      | 3          | 3     | 3      | 3      | 3     | 3      | 3     | 3     | 3     | 4     | 4     | 4     | 4     | 4     | 4      | 4       | 4      | 4      | 4       | 4       | 4       | 4       |
|                               | SD    | 35.0   | 1.7  | 1.7    | 121        | 8.3   | 7      | 2.3    | 180.5 | 18     | 27    | 7.5   | 2106  | 21.3  | 23.9  | 3.7   | 17.3  | 3656  | 6.6    | 0.3     | n/a    | 9.3    | 0.1     | n/a     | 18389   |         |
| Mean                          | 3     | 3      | 3    | 3      | 3          | 3     | 3      | 3      | 3     | 3      | 3     | 3     | 3     | 4     | 4     | 4     | 4     | 4     | 4      | 4       | 4      | 4      | 4       | 4       | 4       | 4       |
|                               | SD    | 155.5  | 18.3 | 27.3   | 103.4      | 9.5   | 11.7   | 103.4  | 9.5   | 11.7   | 1.2   | 187.2 | 4.0   | 12.5  | 3.9   | 230.4 | 29.6  | 19.5  | 15.4   | 19.3    | 616.5  | 39.3   | 12.4    | n/a     | 668.7   |         |
| Mean                          | 3     | 3      | 3    | 3      | 3          | 3     | 3      | 3      | 3     | 3      | 3     | 3     | 3     | 4     | 4     | 4     | 4     | 4     | 4      | 4       | 4      | 4      | 4       | 4       | 4       | 4       |
|                               | SD    | 66.0   | 3.0  | 7.7    | 22.8       | 1.7   | n/a    | n/a    | 15.5  | 0.3    | 1.8   | 0     | 15.5  | 2.5   | 1.9   | 0     | 0.3   | 0.3   | 16     | 2.7     | n/a    | n/a    | n/a     | n/a     | 384.0   |         |
| Mean                          | 3     | 3      | 3    | 3      | 3          | 3     | 3      | 3      | 3     | 3      | 3     | 3     | 3     | 4     | 4     | 4     | 4     | 4     | 4      | 4       | 4      | 4      | 4       | 4       | 4       | 4       |
|                               | SD    | 81.3   | 23.3 | 165.7  | 460        | 246   | 892.7  | 44.3   | 573.3 | 456.8  | 1853  | 160.5 | 2823  | 492.5 | 352.5 | 814.3 | 505   | 738.3 | 305    | 738.3   | 464.6  | 262.6  | 169.1   | 70.1    | 2415    |         |
| Mean                          | 3     | 3      | 3    | 3      | 3          | 3     | 3      | 3      | 3     | 3      | 3     | 3     | 3     | 4     | 4     | 4     | 4     | 4     | 4      | 4       | 4      | 4      | 4       | 4       | 4       | 4       |
|                               | SD    | 28.3   | 11.0 | 82.0   | 247.7      | 146.3 | 424    | 24     | 541.8 | 356.3  | 1694  | 133.5 | 170.3 | 434   | 311.5 | 757   | 162   | 642   | 589.7  | 437.4   | 171    | 441.3  | 233.6   | 163.8   | 60.4    | 264.7   |

\* includes CD11b+ cells

With OH-Tamoxifen at E8.5  
*Csf1r<sup>MeriCreMer</sup>Rosa26<sup>YFP</sup>* pulsed

*Csf1r<sup>iCre</sup>Rosa26<sup>YFP</sup>*

**Supplementary Table 2: Antibodies used for flow cytometry**

| Antibody             | Clone        | Conjugate            | Company       |
|----------------------|--------------|----------------------|---------------|
| CD3                  | 145-2C11     | Biotin               | BD Pharmingen |
| CD3                  | 145-2C11     | PE                   | Biolegend     |
| CD4                  | H129.19      | PE                   | Biolegend     |
| CD8                  | 53-6.7       | PE                   | Biolegend     |
| CD11b                | M1/70        | PE or PE-Cy7         | BD Pharmingen |
| CD11b                | M1/70        | PE or PerCP-Cy5-5    | eBioscience   |
| CD11c                | HL3          | PE                   | BD Pharmingen |
| CD11c                | N418         | PerCP-Cy5-5          | eBioscience   |
| CD16                 | 93           | PE-Cy7               | eBioscience   |
| CD19                 | 1D3          | Biotin               | BD Pharmingen |
| CD19                 | 1D3          | PE                   | Biolegend     |
| CD19                 | 1D3          | Qdot605              | Invitrogen    |
| CD16/32 (FcγRIII/II) | 2.4G         | uncoupled            | BD Pharmingen |
| CD34                 | RAM34        | eFluor660            | eBioscience   |
| CD45                 | 30-F11       | APC-Cy7              | eBioscience   |
| CD45.1               | A20          | FITC                 | BD Pharmingen |
| CD45.2               | 104          | APC-Cy7 or Biotin    | BD Pharmingen |
| CD48                 | HM 48-1      | APC                  | Biolegend     |
| CD48                 | HM 48-1      | APC                  | eBioscience   |
| CD64 (FcγRI)         | X54-5/7.1    | PE                   | Biolegend     |
| CD93                 | AA4.1        | APC                  | eBioscience   |
| CD115                | AFS98        | PE                   | eBioscience   |
| CD117 (c-Kit)        | 2B8          | PE or PE-Cy7         | BD Pharmingen |
| CD117 (c-Kit)        | 2B8          | APC                  | Biolegend     |
| CD117 (c-Kit)        | 2B8          | APC-Cy7              | eBioscience   |
| CD150                | TC15-12F12.2 | PE-Cy7               | Biolegend     |
| CD326 (EpCAM)        | G8.8         | PE-Cy7               | eBioscience   |
| F4/80                | BM8          | Pacific Blue         | Biolegend     |
| F4/80                | BM8          | APC or PE            | BD Pharmingen |
| Ki-67                | B56          | PE                   | BD Pharmingen |
| Ly-6A/E (Sca-1)      | D7           | Bv421 or PerCP-Cy5-5 | Biolegend     |
| Ly-6C                | HK1.4        | APC                  | eBioscience   |
| Ly-6C/6G (Gr-1)      | RB6-8C5      | APC or PE            | BD Pharmingen |
| Ly-6C/6G (Gr-1)      | RB6-8C5      | APC                  | eBioscience   |
| Ly-6G                | 1A8          | PE                   | BD Pharmingen |
| Ly-76                | TER-119      | eFluor 450           | eBioscience   |
| Ly-76                | TER-119      | PE                   | Biolegend     |
| MHC Class II (IA/IE) | M5/114.15.2  | PE-Cy7               | Biolegend     |
| NK1.1                | clone PK136  | Biotin               | BD Pharmingen |
| Siglec-F             | E50-2440     | PE                   | BD Pharmingen |
| Streptavidin         | -            | Pacific Blue         | Invitrogen    |
| Streptavidin         | -            | Qdot605              | Invitrogen    |
| Hoechst 33258        | -            | -                    | Invitrogen    |
